# Supplementary material
Source: PubMed Central journal article supplement (PMC6788773)

Supporting Information  
Figure S1

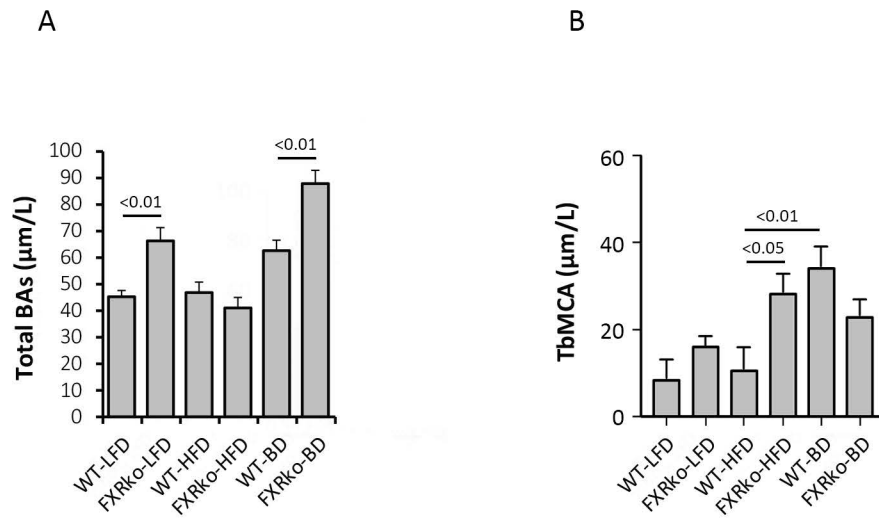

# Supporting Information

## Figure S2

A

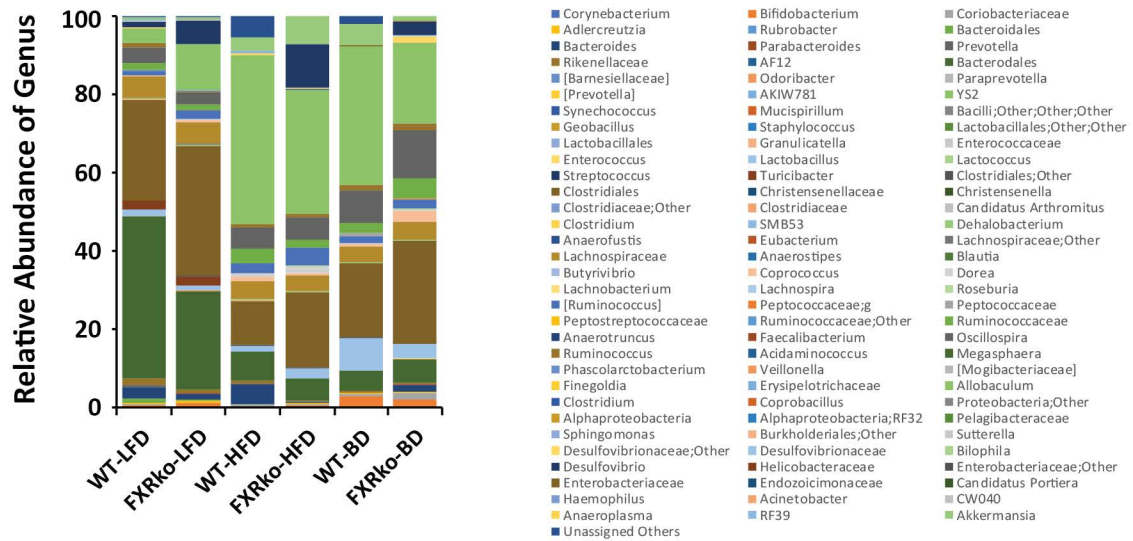

B

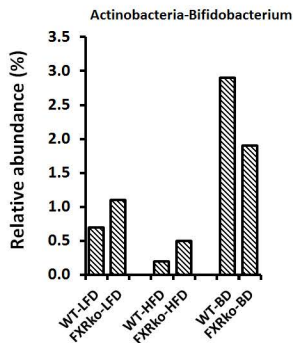

B

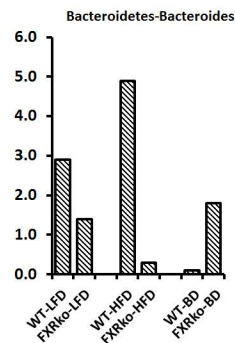

C

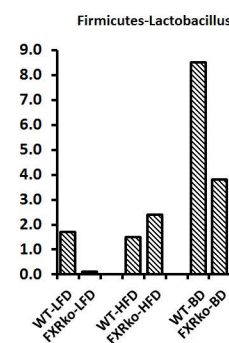

D

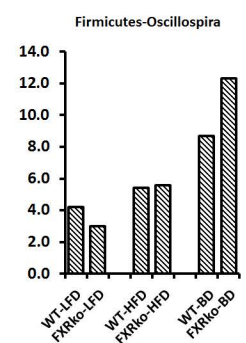

E

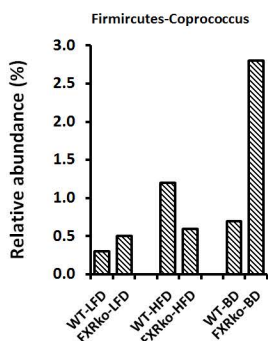

F

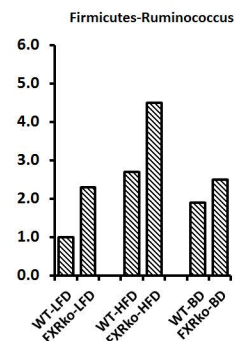

G

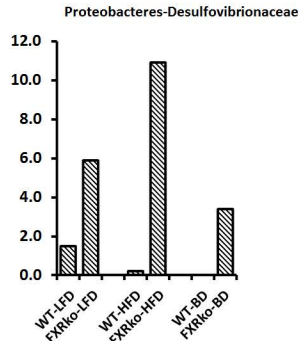

H

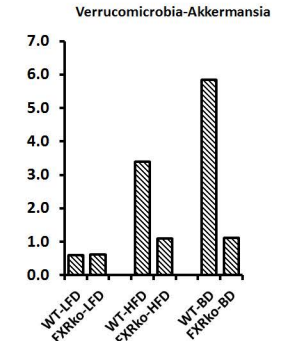

# Supporting Information

## Figure S3

A

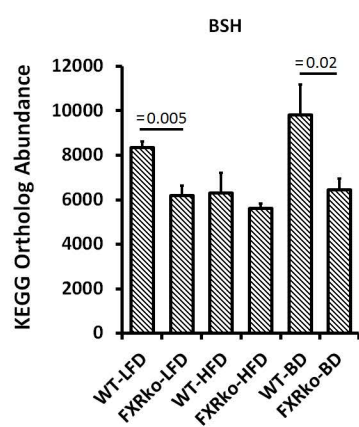

B

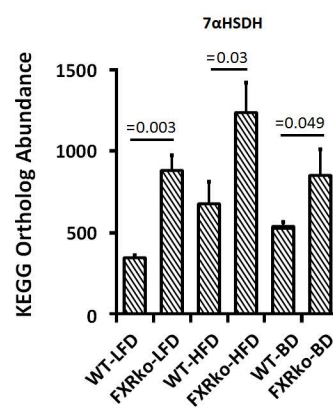

Supplement: NIHMS1519671-supplement-1.pdf [file NIHMS1519671-supplement-1.pdf]
